# Supplementary material for: Unveiling the mechanism of thermal catalytic oxidation of HCHO from the kiln exhaust gas using Sc-decorated Cr2CO2-MXenes
Source: Royal Society of Chemistry journal article supplement (doi:10.1039/d3ta07452h), 2024-01-01
Supplement: d3ta07452h1.pdf [file d3ta07452h1.pdf]

## Supporting information

### Unveiling the mechanism of thermal catalytic oxidation HCHO from kiln exhaust gas by Sc-decorated Cr<sub>2</sub>CO<sub>2</sub>-MXene

Jinkai Yang<sup>1,2</sup>, Zhongyong Zhang<sup>1,2</sup>, Jiahe Peng<sup>1,2</sup>, Jieshuo Wan<sup>1,2</sup>, Zhaohui Liu<sup>1,2</sup>,  
Peng Zhang<sup>3</sup>, Neng Li<sup>1,2\*</sup>

<sup>1</sup>State Key Laboratory of Silicate Materials for Architectures, Wuhan University of Technology, Wuhan 430070, China. E-mail: lineng@whut.edu.cn

<sup>2</sup>Shenzhen Research Institute of Wuhan University of Technology, Shenzhen 518000, Guangdong, China

<sup>3</sup>State Center for International Cooperation on Designer Low-Carbon & Environmental Materials (CDLCEM), School of Materials Science and Engineering, Zhengzhou University, Zhengzhou 450001, China

**Table S1** The different adsorption site and energy of the Sc/Cr<sub>2</sub>CO<sub>2</sub>.

|                  | Fcc     | Hcp     | Top     |
|------------------|---------|---------|---------|
| E <sub>ads</sub> | -393.40 | -393.33 | -393.03 |

**Table S2** The O<sub>2</sub> adsorption energies (E<sub>ads</sub>) of Sc atom on the pristine and defective Cr<sub>2</sub>CO<sub>2</sub> at different temperatures.

|      | O <sub>2</sub> <sub>ads</sub> | O <sub>2</sub> +MXene     | E <sub>ads</sub> |
|------|-------------------------------|---------------------------|------------------|
| 298K | -404.88                       | (-9.27)+(-393.40)=-402.67 | -2.21            |
| 448K | -406.74                       | (-9.27)+(-393.58)=-402.85 | -3.89            |

**Table S3** The HCHO adsorption energies (E<sub>ads</sub>) of Sc atom on the pristine and defective Cr<sub>2</sub>CO<sub>2</sub> at different temperatures.

|      | HCHO <sub>ads</sub> | HCHO+MXene                     | E <sub>ads</sub> |
|------|---------------------|--------------------------------|------------------|
| 298K | -416.64             | (-22.15) + (-393.40) = -415.56 | -1.08            |
| 448K | -418.10             | (-22.15) + (-393.58) = -415.74 | -2.36            |

**Table S4** The O<sub>2</sub> and HCHO co-adsorption energies (E<sub>ads</sub>) of Sc atom on the pristine and defective Cr<sub>2</sub>CO<sub>2</sub> at different temperatures.

|      | (O <sub>2</sub> +HCHO) <sub>ads</sub> | O <sub>2</sub> | HCHO   | MXene   | E <sub>ads</sub> |
|------|---------------------------------------|----------------|--------|---------|------------------|
| 298K | -427.82                               | -8.16          | -22.03 | -393.36 | -4.27            |
| 448K | -429.31                               | -8.16          | -22.03 | -390.59 | -8.53            |

**Table S5** The Gibbs free energy of HCHO oxidation step by ER path.

| <b>298K</b> | <b>E<sub>OSZICAR</sub></b> | <b><math>\Delta G(T)</math></b> | <b>G</b>    |
|-------------|----------------------------|---------------------------------|-------------|
| IS          | -427.57981                 | 0.012069                        | -427.567741 |
| MS1         | -427.57981                 | 0.012069                        | -427.567741 |
| MS2         | -430.33246                 | 0.527995                        | -429.804465 |
| MS3         | -429.39837                 | 0.639147                        | -428.759223 |
| MS4         | -431.69418                 | 0.850447                        | -430.843733 |
| FS          | -430.61894                 | 0.807055                        | -429.811885 |

  

| <b>448K</b> | <b>E<sub>OSZICAR</sub></b> | <b><math>\Delta G(T)</math></b> | <b>G</b>    |
|-------------|----------------------------|---------------------------------|-------------|
| IS          | -406.27919                 | -0.147076                       | -429.056066 |
| MS1         | -406.27919                 | -0.147076                       | -429.056066 |
| MS2         | -431.89099                 | 0.185723                        | -431.705267 |
| MS3         | -430.81743                 | 0.269499                        | -430.547931 |
| MS4         | -432.68295                 | 0.639670                        | -432.043280 |
| FS          | -431.78008                 | 0.373253                        | -431.406827 |

**Table S6** The Gibbs free energy of HCHO oxidation step by LH path.

| <b>298K</b> | <b>E<sub>OSZICAR</sub></b> | <b><math>\Delta G(T)</math></b> | <b>G</b>    |
|-------------|----------------------------|---------------------------------|-------------|
| IS          | -427.81517                 | 0.698875                        | -427.116295 |
| MS1         | -428.36927                 | 0.817818                        | -427.551452 |
| MS2         | -431.70028                 | 0.750686                        | -430.949594 |
| MS3         | -432.39892                 | 0.803076                        | -431.595844 |
| MS4         | -432.21402                 | 0.778342                        | -430.843733 |
| FS          | -430.96599                 | 0.696407                        | -430.269583 |

  

| <b>448K</b> | <b>E<sub>OSZICAR</sub></b> | <b><math>\Delta G(T)</math></b> | <b>G</b>    |
|-------------|----------------------------|---------------------------------|-------------|
| IS          | -429.31078                 | 0.366372                        | -428.944408 |
| MS1         | -429.35546                 | 0.645282                        | -428.710178 |
| MS2         | -433.15537                 | 0.436081                        | -432.719289 |
| MS3         | -433.44335                 | 0.538733                        | -432.904617 |
| MS4         | -432.85121                 | 0.700359                        | -432.150851 |
| FS          | -431.70910                 | 0.567222                        | -431.141878 |

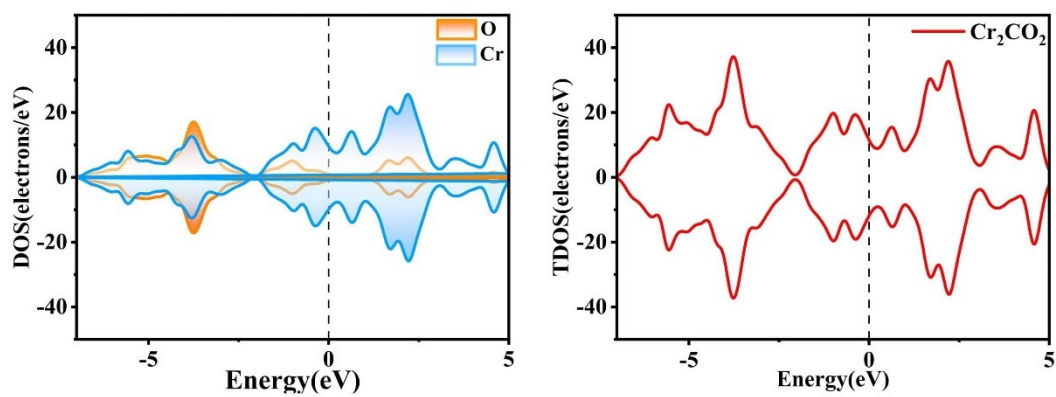

Fig.

S1 Density of states for  $\text{Cr}_2\text{CO}_2$ -MXene.

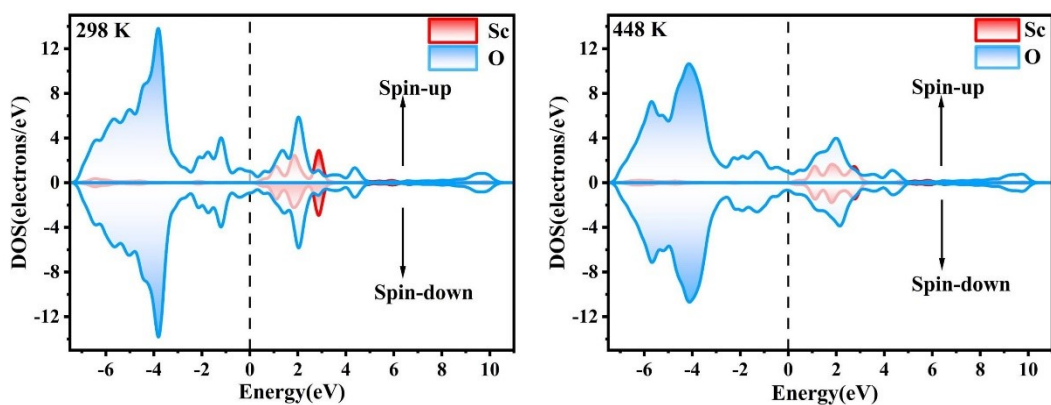

Fig.

S2 Density of states for  $\text{Sc}/\text{Cr}_2\text{CO}_2$ -MXene.

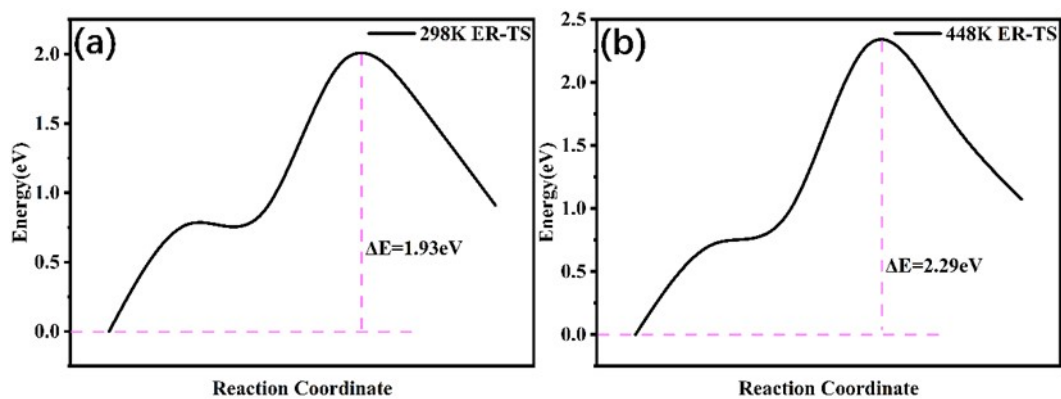

Fig.S3 Transition state search of ER path using CI-NEB method.

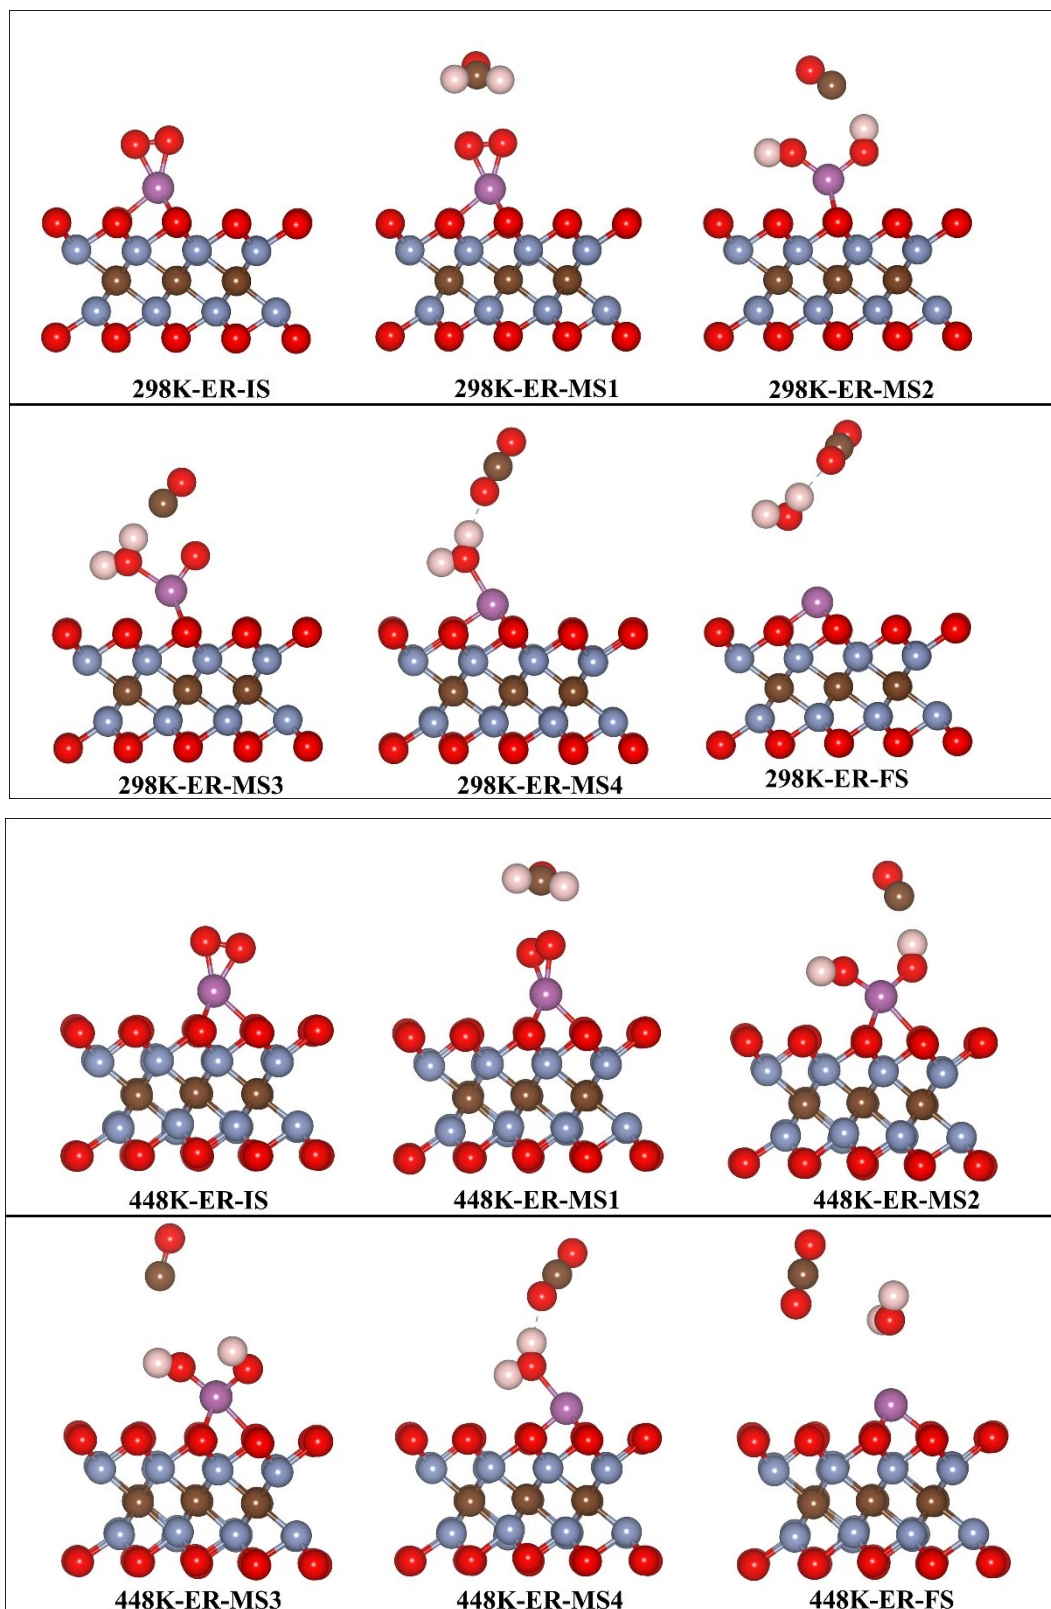

Fig.S4 The configuration of HCHO oxidation step by ER path.

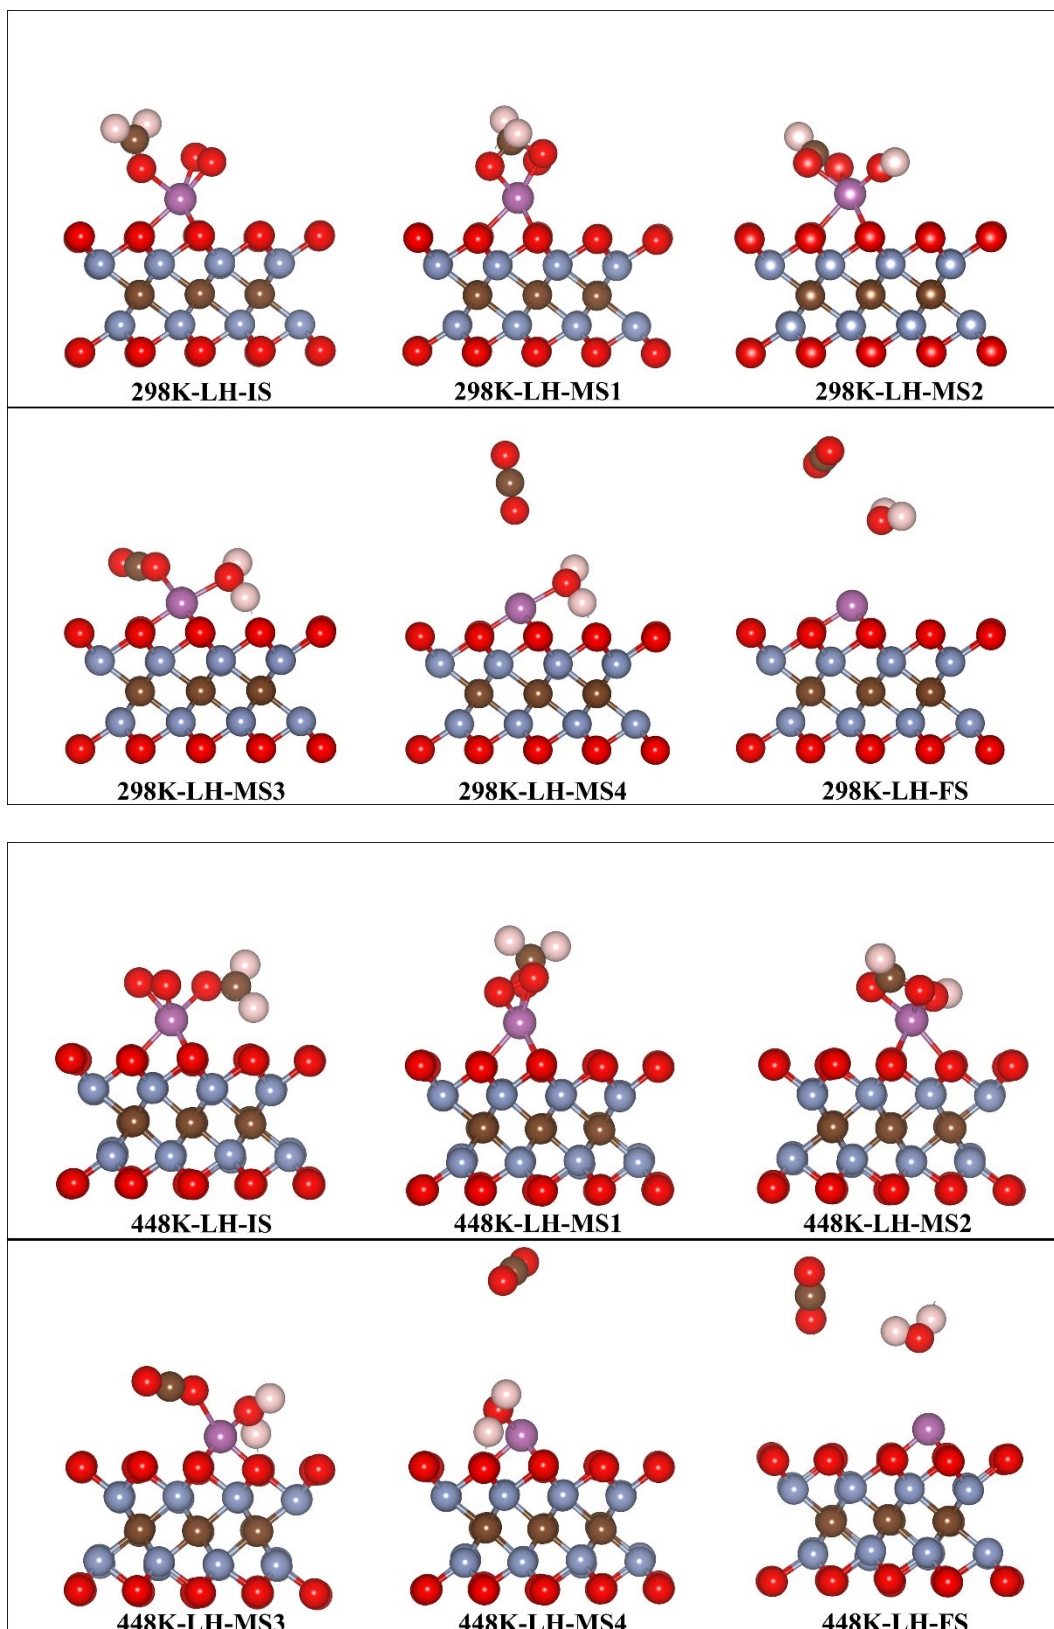

Fig.S5 The configuration of HCHO oxidation step by LH path.
